# Supplementary material for: Rural–Urban Inequalities in Poor Self-Rated Health, Self-Reported Functional Disabilities, and Depression among Chinese Older Adults: Evidence from the China Health and Retirement Longitudinal Study 2011 and 2015
Source: MDPI journal article supplement (doi:10.3390/ijerph18126557), 2021-06-18
Supplement: s1 [file s1]

## Supplementary tables

**Table S1.** Prevalence (%) of impaired Basic Activities of Daily Living (BADLs) among rural and urban respondents, CHARLS 2011 and CHARLS 2015.

|                          | CHARLS 2011 ( <i>n</i> = 5955) |                          |          | CHARLS 2015 ( <i>n</i> = 7338) |                          |          |
|--------------------------|--------------------------------|--------------------------|----------|--------------------------------|--------------------------|----------|
|                          | Rural ( <i>n</i> = 4337)       | Urban ( <i>n</i> = 1618) | <i>p</i> | Rural ( <i>n</i> = 5366)       | Urban ( <i>n</i> = 1972) | <i>p</i> |
| Total                    | 28.2                           | 17.1                     | <0.001   | 30.5                           | 20.6                     | <0.001   |
| Age group (years)        |                                |                          |          |                                |                          |          |
| 60-64                    | 21.5                           | 10.2                     | <0.001   | 22.6                           | 13.6                     | <0.001   |
| 65-69                    | 25.6                           | 16.0                     | <0.001   | 29.1                           | 16.3                     | <0.001   |
| 70-74                    | 31.9                           | 16.7                     | <0.001   | 34.7                           | 21.5                     | <0.001   |
| 75-79                    | 36.7                           | 19.2                     | <0.001   | 39.5                           | 29.3                     | 0.004    |
| 80-84                    | 45.5                           | 41.2                     | 0.457    | 45.1                           | 33.3                     | 0.025    |
| 85-89                    | 49.4                           | 57.6                     | 0.425    | 48.9                           | 56.3                     | 0.381    |
| 90+                      | 51.9                           | 42.9                     | 1.000    | 51.2                           | 66.7                     | 0.303    |
| Sex                      |                                |                          |          |                                |                          |          |
| Male                     | 24.0                           | 16.1                     | <0.001   | 25.5                           | 19.1                     | <0.001   |
| Female                   | 32.3                           | 18.3                     | <0.001   | 35.2                           | 22.2                     | <0.001   |
| Marital status           |                                |                          |          |                                |                          |          |
| Married                  | 26.5                           | 15.5                     | <0.001   | 28.0                           | 19.1                     | <0.001   |
| Unmarried                | 33.9                           | 24.0                     | 0.001    | 39.1                           | 27.4                     | 0.001    |
| Living arrangement       |                                |                          |          |                                |                          |          |
| Not living alone         | 27.8                           | 16.9                     | <0.001   | 30.0                           | 20.3                     | <0.001   |
| Living alone             | 31.4                           | 18.5                     | 0.001    | 35.2                           | 24.5                     | 0.016    |
| Living near children     |                                |                          |          |                                |                          |          |
| Living near children     | 27.9                           | 17.6                     | <0.001   | 30.9                           | 21.4                     | <0.001   |
| Not living near children | 31.8                           | 6.5                      | <0.001   | 26.3                           | 14.6                     | 0.001    |
| No child                 | 26.4                           | 18.0                     | 0.261    | 34.3                           | 13.8                     | 0.033    |
| Educational level        |                                |                          |          |                                |                          |          |
| Below primary school     | 31.6                           | 25.1                     | 0.006    | 33.6                           | 29.9                     | 0.119    |
| Primary school           | 22.7                           | 16.8                     | 0.016    | 27.3                           | 22.5                     | 0.033    |
| Middle school            | 19.0                           | 13.7                     | 0.050    | 21.9                           | 15.6                     | 0.009    |
| High school              | 10.8                           | 10.7                     | 0.995    | 13.3                           | 17.8                     | 0.242    |
| College and above        | 0.0                            | 15.8                     | 1.000    | 0.0                            | 9.9                      | 1.000    |
| Income group             |                                |                          |          |                                |                          |          |
| First group (low)        | 33.7                           | 28.8                     | 0.411    | 31.4                           | 19.8                     | 0.017    |
| Second group             | 33.8                           | 36.1                     | 0.770    | 28.3                           | 38.5                     | 0.262    |
| Third group              | 25.1                           | 27.0                     | 0.686    | 28.6                           | 28.9                     | 0.965    |
| Fourth group             | 20.2                           | 20.0                     | 0.944    | 25.7                           | 21.3                     | 0.284    |
| Fifth group (high)       | 14.9                           | 12.0                     | 0.209    | 19.9                           | 16.5                     | 0.273    |
| Missing                  | 28.8                           | 20.4                     | 0.007    | 33.0                           | 21.6                     | <0.001   |

**Table S2.** Prevalence (%) of impaired Instrumental Activities of Daily Living (IADLs) among rural and urban respondents, CHARLS 2011 and CHARLS 2015.

|                          | CHARLS 2011 ( <i>n</i> = 5963) |                          |          | CHARLS 2015 ( <i>n</i> = 7192) |                          |          |
|--------------------------|--------------------------------|--------------------------|----------|--------------------------------|--------------------------|----------|
|                          | Rural ( <i>n</i> = 4336)       | Urban ( <i>n</i> = 1627) | <i>p</i> | Rural ( <i>n</i> = 5237)       | Urban ( <i>n</i> = 1955) | <i>p</i> |
| Total                    | 33.9                           | 21.3                     | <0.001   | 33.6                           | 20.8                     | <0.001   |
| Age group (years)        |                                |                          |          |                                |                          |          |
| 60-64                    | 24.5                           | 13.3                     | <0.001   | 25.4                           | 12.4                     | <0.001   |
| 65-69                    | 30.5                           | 18.5                     | <0.001   | 31.4                           | 17.3                     | <0.001   |
| 70-74                    | 38.7                           | 20.0                     | <0.001   | 36.2                           | 22.6                     | <0.001   |
| 75-79                    | 45.5                           | 26.4                     | <0.001   | 44.4                           | 29.0                     | <0.001   |
| 80-84                    | 57.6                           | 52.0                     | 0.341    | 54.8                           | 34.7                     | <0.001   |
| 85-89                    | 69.8                           | 69.7                     | 0.994    | 59.5                           | 60.9                     | 0.873    |
| 90+                      | 80.8                           | 57.1                     | 1.000    | 56.1                           | 80.0                     | 0.102    |
| Sex                      |                                |                          |          |                                |                          |          |
| Male                     | 27.2                           | 19.0                     | <0.001   | 26.5                           | 17.8                     | <0.001   |
| Female                   | 40.6                           | 23.9                     | <0.001   | 40.3                           | 24.1                     | <0.001   |
| Marital status           |                                |                          |          |                                |                          |          |
| Married                  | 30.6                           | 19.8                     | <0.001   | 30.7                           | 19.4                     | <0.001   |
| Unmarried                | 45.0                           | 28.1                     | <0.001   | 43.9                           | 27.4                     | <0.001   |
| Living arrangement       |                                |                          |          |                                |                          |          |
| Not living alone         | 34.0                           | 21.4                     | <0.001   | 33.4                           | 20.6                     | <0.001   |
| Living alone             | 33.3                           | 20.9                     | 0.001    | 35.7                           | 23.2                     | 0.006    |
| Living near children     |                                |                          |          |                                |                          |          |
| Living near children     | 34.1                           | 21.4                     | <0.001   | 34.4                           | 21.8                     | <0.001   |
| Not living near children | 31.2                           | 14.1                     | 0.003    | 27.2                           | 11.6                     | <0.001   |
| No child                 | 35.2                           | 31.4                     | 0.647    | 35.3                           | 27.6                     | 0.438    |
| Educational level        |                                |                          |          |                                |                          |          |
| Below primary school     | 39.1                           | 33.3                     | 0.021    | 38.4                           | 32.4                     | 0.015    |
| Primary school           | 24.9                           | 21.9                     | 0.228    | 27.1                           | 22.5                     | 0.042    |
| Middle school            | 20.3                           | 16.3                     | 0.163    | 21.3                           | 15.8                     | 0.023    |
| High school              | 13.8                           | 14.0                     | 0.971    | 18.9                           | 15.3                     | 0.355    |
| College and above        | 0.0                            | 11.2                     | 1.000    | 16.7                           | 10.7                     | 0.648    |
| Income group             |                                |                          |          |                                |                          |          |
| First group (low)        | 38.3                           | 36.4                     | 0.752    | 31.2                           | 18.1                     | 0.007    |
| Second group             | 39.5                           | 44.4                     | 0.549    | 29.4                           | 36.0                     | 0.481    |
| Third group              | 30.5                           | 31.7                     | 0.807    | 30.2                           | 44.7                     | 0.060    |
| Fourth group             | 28.0                           | 25.3                     | 0.389    | 28.9                           | 15.7                     | 0.002    |
| Fifth group (high)       | 23.4                           | 17.1                     | 0.021    | 18.2                           | 13.5                     | 0.106    |
| Missing                  | 33.8                           | 19.1                     | <0.001   | 38.1                           | 23.7                     | <0.001   |

**Table S3.** Prevalence (%) of self-reported depression among rural and urban respondents, CHARLS 2011 and CHARLS 2015

|                          | CHARLS 2011 ( <i>n</i> = 5567) |                          |          | CHARLS 2015 ( <i>n</i> = 6811) |                          |          |
|--------------------------|--------------------------------|--------------------------|----------|--------------------------------|--------------------------|----------|
|                          | Rural ( <i>n</i> = 4004)       | Urban ( <i>n</i> = 1523) | <i>p</i> | Rural ( <i>n</i> = 4999)       | Urban ( <i>n</i> = 1812) | <i>p</i> |
| Total                    | 47.4                           | 27.8                     | <0.001   | 40.5                           | 22.7                     | <0.001   |
| Age group (years)        |                                |                          |          |                                |                          |          |
| 60-64                    | 45.6                           | 27.4                     | <0.001   | 38.4                           | 21.4                     | <0.001   |
| 65-69                    | 47.4                           | 29.2                     | <0.001   | 43.9                           | 22.6                     | <0.001   |
| 70-74                    | 48.9                           | 25.9                     | <0.001   | 42.0                           | 25.6                     | <0.001   |
| 75-79                    | 48.0                           | 23.0                     | <0.001   | 39.7                           | 24.2                     | <0.001   |
| 80-84                    | 51.2                           | 37.8                     | 0.039    | 36.6                           | 20.0                     | 0.003    |
| 85-89                    | 55.1                           | 43.5                     | 0.335    | 36.1                           | 15.6                     | 0.032    |
| 90+                      | 47.1                           | 42.9                     | 1.000    | 33.3                           | 40.0                     | 1.000    |
| Sex                      |                                |                          |          |                                |                          |          |
| Male                     | 39.5                           | 20.5                     | <0.001   | 32.4                           | 19.1                     | <0.001   |
| Female                   | 55.0                           | 35.6                     | <0.001   | 48.4                           | 26.6                     | <0.001   |
| Marital status           |                                |                          |          |                                |                          |          |
| Married                  | 45.1                           | 25.3                     | <0.001   | 38.3                           | 21.4                     | <0.001   |
| Unmarried                | 55.3                           | 38.5                     | <0.001   | 49.1                           | 28.7                     | <0.001   |
| Living arrangement       |                                |                          |          |                                |                          |          |
| Not living alone         | 46.8                           | 26.6                     | <0.001   | 40.0                           | 22.4                     | <0.001   |
| Living alone             | 52.9                           | 35.5                     | <0.001   | 46.3                           | 26.3                     | <0.001   |
| Living near children     |                                |                          |          |                                |                          |          |
| Living near children     | 46.6                           | 27.7                     | <0.001   | 40.0                           | 22.6                     | <0.001   |
| Not living near children | 57.4                           | 25.0                     | <0.001   | 43.3                           | 22.5                     | <0.001   |
| No child                 | 46.5                           | 34.0                     | 0.164    | 48.4                           | 34.8                     | 0.241    |
| Educational level        |                                |                          |          |                                |                          |          |
| Below primary school     | 51.2                           | 37.5                     | <0.001   | 44.8                           | 31.8                     | <0.001   |
| Primary school           | 41.5                           | 31.9                     | 0.002    | 35.3                           | 24.1                     | <0.001   |
| Middle school            | 35.7                           | 24.5                     | 0.001    | 29.6                           | 19.5                     | <0.001   |
| High school              | 31.7                           | 18.4                     | 0.022    | 26.7                           | 17.9                     | 0.041    |
| College and above        | 25.0                           | 14.7                     | 0.483    | 0.0                            | 14.8                     | 0.308    |
| Income group             |                                |                          |          |                                |                          |          |
| First group (low)        | 50.8                           | 49.2                     | 0.806    | 44.8                           | 23.6                     | <0.001   |
| Second group             | 53.5                           | 41.2                     | 0.157    | 41.9                           | 23.1                     | 0.056    |
| Third group              | 45.7                           | 44.7                     | 0.845    | 43.2                           | 39.5                     | 0.651    |
| Fourth group             | 42.4                           | 29.3                     | <0.001   | 36.2                           | 32.6                     | 0.430    |
| Fifth group (high)       | 32.7                           | 22.9                     | 0.002    | 30.9                           | 16.7                     | <0.001   |
| Missing                  | 46.1                           | 27.7                     | <0.001   | 40.4                           | 23.6                     | <0.001   |

**Table S4.** Multiple logistic regression analyses on rural and urban respondents' impaired Basic Activities of Daily Living (BADLs), adjusted for age and sex, CHARLS 2011 ( $n = 5995$ )

|                                   | <b>Model 1</b> |           | <b>Model 2</b> |           | <b>Model 3</b> |           | <b>Model 4</b> |           | <b>Model 5</b> |           |
|-----------------------------------|----------------|-----------|----------------|-----------|----------------|-----------|----------------|-----------|----------------|-----------|
|                                   | OR             | 95% CI    |
| Rural respondents <sup>a</sup>    | 1.99           | 1.72-2.31 | 1.96           | 1.69-2.28 | 1.59           | 1.34-1.89 | 1.24           | 1.03-1.48 | 1.09           | 0.90-1.32 |
| Marital status <sup>b</sup>       |                |           |                |           |                |           |                |           |                |           |
| Unmarried                         | —              | —         | 1.08           | 0.91-1.29 | 1.07           | 0.90-1.27 | 1.10           | 0.93-1.32 | 1.09           | 0.91-1.30 |
| Living arrangement <sup>c</sup>   |                |           |                |           |                |           |                |           |                |           |
| Living alone                      | —              | —         | 0.82           | 0.65-1.04 | 0.82           | 0.65-1.04 | 0.72           | 0.57-0.92 | 0.73           | 0.57-0.92 |
| Living near children <sup>d</sup> |                |           |                |           |                |           |                |           |                |           |
| Not living near children          | —              | —         | 1.25           | 0.98-1.59 | 1.25           | 0.98-1.60 | 1.19           | 0.93-1.52 | 1.19           | 0.93-1.52 |
| No child                          | —              | —         | 1.07           | 0.71-1.62 | 1.05           | 0.69-1.58 | 1.07           | 0.71-1.62 | 1.05           | 0.69-1.60 |
| Educational level <sup>e</sup>    |                |           |                |           |                |           |                |           |                |           |
| Primary school                    | —              | —         | —              | —         | 0.77           | 0.65-0.90 | —              | —         | 0.79           | 0.67-0.93 |
| Middle school                     | —              | —         | —              | —         | 0.66           | 0.53-0.84 | —              | —         | 0.73           | 0.58-0.91 |
| High school                       | —              | —         | —              | —         | 0.44           | 0.30-0.64 | —              | —         | 0.52           | 0.35-0.76 |
| College and above                 | —              | —         | —              | —         | 0.66           | 0.40-1.09 | —              | —         | 0.81           | 0.49-1.35 |
| Income group <sup>f</sup>         |                |           |                |           |                |           |                |           |                |           |
| Second group                      | —              | —         | —              | —         | —              | —         | 1.09           | 0.90-1.32 | 1.08           | 0.90-1.31 |
| Third group                       | —              | —         | —              | —         | —              | —         | 0.76           | 0.62-0.93 | 0.76           | 0.62-0.93 |
| Fourth group                      | —              | —         | —              | —         | —              | —         | 0.59           | 0.47-0.73 | 0.59           | 0.48-0.74 |
| Fifth group (high)                | —              | —         | —              | —         | —              | —         | 0.35           | 0.27-0.46 | 0.38           | 0.29-0.49 |

|         |   |   |   |   |   |   |      |               |      |               |
|---------|---|---|---|---|---|---|------|---------------|------|---------------|
| Missing | — | — | — | — | — | — | 0.80 | 0.65-<br>0.99 | 0.81 | 0.66-<br>0.99 |
|---------|---|---|---|---|---|---|------|---------------|------|---------------|

OR: odds ratio; CI: confidence interval 95%; <sup>a</sup> Reference group: urban respondents; <sup>b</sup> Reference group= unmarried; <sup>c</sup> Reference group= not living alone; <sup>d</sup> Reference group= living near children; <sup>e</sup> Reference group= below primary school; <sup>f</sup> Reference group= first group (low)

**Table S5.** Multiple logistic regression analyses on rural and urban respondents' impaired Basic Activities of Daily Living (BADLs), adjusted for age and sex, CHARLS 2015 (*n* = 7338)

|                                   | <b>Model 1</b> |           | <b>Model 2</b> |           | <b>Model 3</b> |           |
|-----------------------------------|----------------|-----------|----------------|-----------|----------------|-----------|
|                                   | OR             | 95% CI    | OR             | 95% CI    | OR             | 95% CI    |
| Rural respondents <sup>a</sup>    | 1.76           | 1.55-2.00 | 1.74           | 1.54-1.98 | 1.43           | 1.24-1.65 |
| Marital status <sup>b</sup>       |                |           |                |           |                |           |
| Unmarried                         | —              | —         | 1.22           | 1.05-1.42 | 1.20           | 1.03-1.40 |
| Living arrangement <sup>c</sup>   |                |           |                |           |                |           |
| Living alone                      | —              | —         | 0.80           | 0.64-0.99 | 0.80           | 0.64-0.99 |
| Living near children <sup>d</sup> |                |           |                |           |                |           |
| Not living near children          | —              | —         | 0.96           | 0.80-1.15 | 0.97           | 0.81-1.17 |
| No child                          | —              | —         | 1.24           | 0.83-1.83 | 1.19           | 0.80-1.76 |
| Educational level <sup>e</sup>    |                |           |                |           |                |           |
| Primary school                    | —              | —         | —              | —         | 0.86           | 0.75-0.98 |
| Middle school                     | —              | —         | —              | —         | 0.68           | 0.57-0.82 |
| High school                       | —              | —         | —              | —         | 0.61           | 0.47-0.81 |
| College and above                 | —              | —         | —              | —         | 0.31           | 0.18-0.55 |

OR: odds ratio; CI: confidence interval 95%;

<sup>a</sup> Reference group: urban respondents; <sup>b</sup> Reference group= unmarried; <sup>c</sup> Reference group= not living alone; <sup>d</sup> Reference group= living near children; <sup>e</sup> Reference group= below primary school

**Table S6.** Multiple logistic regression analyses on rural and urban respondents' impaired Instrumental Activities of Daily Living (IADLs), adjusted for age and sex, CHARLS 2011 (*n* = 5963)

|                                      | <b>Model<br/>1</b> |               | <b>Model<br/>2</b> |               | <b>Model<br/>3</b> |               | <b>Model<br/>4</b> |               | <b>Model<br/>5</b> |               |
|--------------------------------------|--------------------|---------------|--------------------|---------------|--------------------|---------------|--------------------|---------------|--------------------|---------------|
|                                      | OR                 | 95% CI        |
| Rural respondents <sup>a</sup>       | 2.05               | 1.78-<br>2.35 | 1.97               | 1.71-<br>2.27 | 1.46               | 1.25-<br>1.72 | 1.40               | 1.19-<br>1.66 | 1.13               | 0.95-<br>1.36 |
| Marital status <sup>b</sup>          |                    |               |                    |               |                    |               |                    |               |                    |               |
| Unmarried                            | —                  | —             | 1.44               | 1.22-<br>1.70 | 1.41               | 1.19-<br>1.67 | 1.45               | 1.23-<br>1.73 | 1.43               | 1.21-<br>1.70 |
| Living arrangement <sup>c</sup>      |                    |               |                    |               |                    |               |                    |               |                    |               |
| Living alone                         | —                  | —             | 0.48               | 0.38-<br>0.60 | 0.47               | 0.37-<br>0.59 | 0.43               | 0.34-<br>0.55 | 0.43               | 0.34-<br>0.55 |
| Living near children<br><sup>d</sup> |                    |               |                    |               |                    |               |                    |               |                    |               |
| Not living near<br>children          | —                  | —             | 1.07               | 0.84-<br>1.36 | 1.08               | 0.85-<br>1.38 | 1.02               | 0.80-<br>1.30 | 1.03               | 0.80-<br>1.31 |
| No child                             | —                  | —             | 1.59               | 1.09-<br>2.33 | 1.57               | 1.07-<br>2.30 | 1.59               | 1.08-<br>2.33 | 1.57               | 1.07-<br>2.31 |
| Educational level <sup>e</sup>       |                    |               |                    |               |                    |               |                    |               |                    |               |
| Primary school                       | —                  | —             | —                  | —             | 0.68               | 0.59-<br>0.80 | —                  | —             | 0.70               | 0.60-<br>0.81 |
| Middle school                        | —                  | —             | —                  | —             | 0.57               | 0.46-<br>0.71 | —                  | —             | 0.60               | 0.48-<br>0.75 |
| High school                          | —                  | —             | —                  | —             | 0.42               | 0.30-<br>0.59 | —                  | —             | 0.47               | 0.33-<br>0.67 |
| College and above                    | —                  | —             | —                  | —             | 0.31               | 0.17-<br>0.54 | —                  | —             | 0.35               | 0.20-<br>0.62 |
| Income group <sup>f</sup>            |                    |               |                    |               |                    |               |                    |               |                    |               |
| Second group                         | —                  | —             | —                  | —             | —                  | —             | 1.18               | 0.98-<br>1.43 | 1.17               | 0.97-<br>1.41 |
| Third group                          | —                  | —             | —                  | —             | —                  | —             | 0.81               | 0.66-<br>0.99 | 0.81               | 0.66-<br>0.98 |
| Fourth group                         | —                  | —             | —                  | —             | —                  | —             | 0.73               | 0.59-<br>0.90 | 0.73               | 0.59-<br>0.90 |
| Fifth group (high)                   | —                  | —             | —                  | —             | —                  | —             | 0.50               | 0.39-<br>0.63 | 0.55               | 0.43-<br>0.70 |

|         |   |   |   |   |   |   |      |               |      |               |
|---------|---|---|---|---|---|---|------|---------------|------|---------------|
| Missing | — | — | — | — | — | — | 0.79 | 0.64-<br>0.96 | 0.80 | 0.65-<br>0.98 |
|---------|---|---|---|---|---|---|------|---------------|------|---------------|

OR: odds ratio; CI: confidence interval 95%;

<sup>a</sup> Reference group: urban respondents; <sup>b</sup> Reference group= unmarried; <sup>c</sup> Reference group= not living alone; <sup>d</sup> Reference group= living near children; <sup>e</sup> Reference group= below primary school; <sup>f</sup> Reference group= first group (low)



**Table S7.** Multiple logistic regression analyses on rural and urban respondents' impaired Instrumental Activities of Daily Living (IADLs), adjusted for age and sex, CHARLS 2015 (*n* = 7192)

|                                   | <b>Model 1</b> |           | <b>Model 2</b> |           | <b>Model 3</b> |           |
|-----------------------------------|----------------|-----------|----------------|-----------|----------------|-----------|
|                                   | OR             | 95% CI    | OR             | 95% CI    | OR             | 95% CI    |
| Rural respondents <sup>a</sup>    | 2.03           | 1.79-2.31 | 2.02           | 1.78-2.30 | 1.59           | 1.38-1.84 |
| Marital status <sup>b</sup>       |                |           |                |           |                |           |
| Unmarried                         | —              | —         | 1.27           | 1.09-1.49 | 1.25           | 1.07-1.45 |
| Living arrangement <sup>c</sup>   |                |           |                |           |                |           |
| Living alone                      | —              | —         | 0.62           | 0.50-0.78 | 0.62           | 0.50-0.78 |
| Living near children <sup>d</sup> |                |           |                |           |                |           |
| Not living near children          | —              | —         | 0.86           | 0.72-1.04 | 0.87           | 0.72-1.05 |
| No child                          | —              | —         | 1.46           | 0.99-2.15 | 1.38           | 0.93-2.04 |
| Educational level <sup>e</sup>    |                |           |                |           |                |           |
| Primary school                    | —              | —         | —              | —         | 0.75           | 0.65-0.86 |
| Middle school                     | —              | —         | —              | —         | 0.61           | 0.51-0.74 |
| High school                       | —              | —         | —              | —         | 0.56           | 0.42-0.74 |
| College and above                 | —              | —         | —              | —         | 0.34           | 0.20-0.59 |

OR: odds ratio; CI: confidence interval 95%;

<sup>a</sup> Reference group: urban respondents; <sup>b</sup> Reference group= unmarried; <sup>c</sup> Reference group= not living alone; <sup>d</sup> Reference group= living near children; <sup>e</sup> Reference group= below primary school

**Table S8.** Multiple logistic regression analyses on rural and urban respondents' self-reported depression, adjusted for age and sex, CHARLS 2011 ( $n = 5567$ )

|                                      | <b>Model<br/>1</b> |               | <b>Model<br/>2</b> |               | <b>Model<br/>3</b> |               | <b>Model<br/>4</b> |               | <b>Model<br/>5</b> |               |
|--------------------------------------|--------------------|---------------|--------------------|---------------|--------------------|---------------|--------------------|---------------|--------------------|---------------|
|                                      | OR                 | 95% CI        |
| Rural respondents <sup>a</sup>       | 2.36               | 2.07-<br>2.69 | 2.32               | 2.03-<br>2.64 | 1.81               | 1.56-<br>2.10 | 1.63               | 1.40-<br>1.91 | 1.38               | 1.17-<br>1.63 |
| Marital status <sup>b</sup>          |                    |               |                    |               |                    |               |                    |               |                    |               |
| Unmarried                            | —                  | —             | 1.39               | 1.18-<br>1.65 | 1.37               | 1.16-<br>1.62 | 1.40               | 1.19-<br>1.66 | 1.39               | 1.17-<br>1.64 |
| Living arrangement <sup>c</sup>      |                    |               |                    |               |                    |               |                    |               |                    |               |
| Living alone                         | —                  | —             | 0.97               | 0.78-<br>1.21 | 0.97               | 0.78-<br>1.20 | 0.90               | 0.72-<br>1.13 | 0.91               | 0.73-<br>1.13 |
| Living near children<br><sup>d</sup> |                    |               |                    |               |                    |               |                    |               |                    |               |
| Not living near<br>children          | —                  | —             | 1.55               | 1.24-<br>1.93 | 1.55               | 1.24-<br>1.94 | 1.48               | 1.18-<br>1.85 | 1.49               | 1.18-<br>1.86 |
| No child                             | —                  | —             | 1.12               | 0.78-<br>1.62 | 1.10               | 0.76-<br>1.59 | 1.11               | 0.76-<br>1.61 | 1.09               | 0.75-<br>1.58 |
| Educational level <sup>e</sup>       |                    |               |                    |               |                    |               |                    |               |                    |               |
| Primary school                       | —                  | —             | —                  | —             | 0.84               | 0.73-<br>0.96 | —                  | —             | 0.86               | 0.74-<br>0.99 |
| Middle school                        | —                  | —             | —                  | —             | 0.65               | 0.53-<br>0.79 | —                  | —             | 0.69               | 0.56-<br>0.84 |
| High school                          | —                  | —             | —                  | —             | 0.49               | 0.36-<br>0.66 | —                  | —             | 0.55               | 0.40-<br>0.75 |
| College and above                    | —                  | —             | —                  | —             | 0.37               | 0.22-<br>0.61 | —                  | —             | 0.43               | 0.26-<br>0.72 |
| Income group <sup>f</sup>            |                    |               |                    |               |                    |               |                    |               |                    |               |
| Second group                         | —                  | —             | —                  | —             | —                  | —             | 1.12               | 0.93-<br>1.35 | 1.12               | 0.93-<br>1.34 |
| Third group                          | —                  | —             | —                  | —             | —                  | —             | 0.86               | 0.71-<br>1.04 | 0.86               | 0.71-<br>1.04 |
| Fourth group                         | —                  | —             | —                  | —             | —                  | —             | 0.70               | 0.58-<br>0.86 | 0.71               | 0.58-<br>0.87 |
| Fifth group (high)                   | —                  | —             | —                  | —             | —                  | —             | 0.47               | 0.38-<br>0.59 | 0.52               | 0.41-<br>0.65 |

|         |   |   |   |   |   |   |      |               |      |               |
|---------|---|---|---|---|---|---|------|---------------|------|---------------|
| Missing | — | — | — | — | — | — | 0.77 | 0.63-<br>0.94 | 0.79 | 0.65-<br>0.96 |
|---------|---|---|---|---|---|---|------|---------------|------|---------------|

OR: odds ratio; CI: confidence interval 95%;

<sup>a</sup> Reference group: urban respondents; <sup>b</sup> Reference group= unmarried; <sup>c</sup> Reference group= not living alone; <sup>d</sup> Reference group= living near children; <sup>e</sup> Reference group= below primary school; <sup>f</sup> Reference group= first group (low)

**Table S9.** Multiple logistic regression analyses on rural and urban respondents' self-reported depression, adjusted for age and sex, CHARLS 2015 (*n* = 6811)

|                                   | <b>Model 1</b> |           | <b>Model 2</b> |           | <b>Model 3</b> |           |
|-----------------------------------|----------------|-----------|----------------|-----------|----------------|-----------|
|                                   | OR             | 95% CI    | OR             | 95% CI    | OR             | 95% CI    |
| Rural respondents <sup>a</sup>    | 2.32           | 2.05-2.63 | 2.29           | 2.02-2.60 | 1.84           | 1.60-2.12 |
| Marital status <sup>b</sup>       |                |           |                |           |                |           |
| Unmarried                         | —              | —         | 1.51           | 1.29-1.76 | 1.48           | 1.26-1.73 |
| Living arrangement <sup>c</sup>   |                |           |                |           |                |           |
| Living alone                      | —              | —         | 0.85           | 0.68-1.05 | 0.85           | 0.68-1.05 |
| Living near children <sup>d</sup> |                |           |                |           |                |           |
| Not living near children          | —              | —         | 1.22           | 1.04-1.45 | 1.24           | 1.05-1.47 |
| No child                          | —              | —         | 1.62           | 1.10-2.38 | 1.54           | 1.05-2.27 |
| Educational level <sup>e</sup>    |                |           |                |           |                |           |
| Primary school                    | —              | —         | —              | —         | 0.77           | 0.68-0.88 |
| Middle school                     | —              | —         | —              | —         | 0.62           | 0.52-0.74 |
| High school                       | —              | —         | —              | —         | 0.57           | 0.43-0.74 |
| College and above                 | —              | —         | —              | —         | 0.44           | 0.26-0.73 |

OR: odds ratio; CI: confidence interval 95%;

<sup>a</sup> Reference group: urban respondents; <sup>b</sup> Reference group= unmarried; <sup>c</sup> Reference group= not living alone; <sup>d</sup> Reference group= living near children; <sup>e</sup> Reference group= below primary school
